# Supplementary material
Source: Springer Nature journal article supplement (https://www.springermedizin.de/resource/supplementary/12245_2013_174_MOESM2_ESM.pdf/9672924)

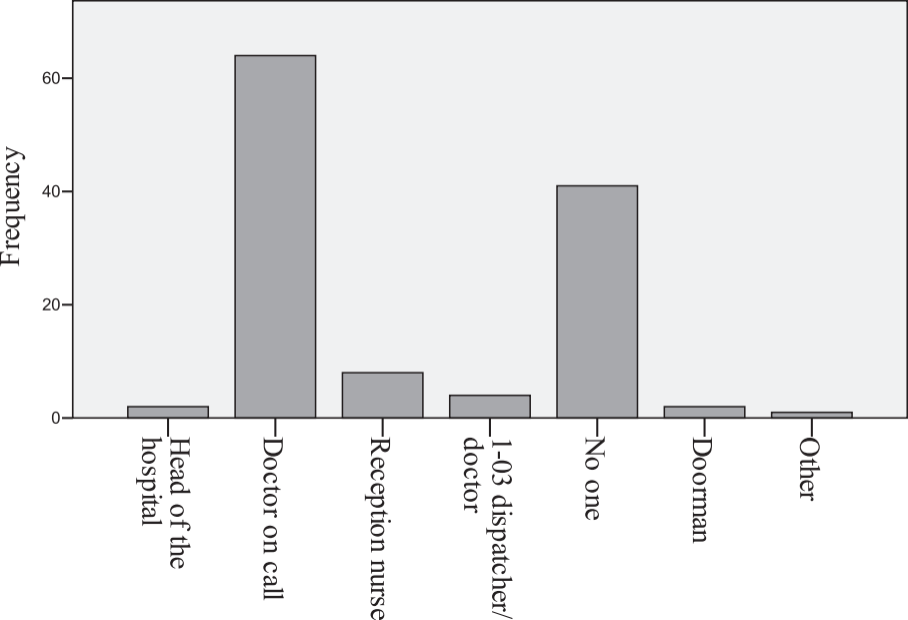

Supplement: MOESM2 [file 9672924]
